# Supplementary material for: Novel Plasmids and Resistance Phenotypes in Yersinia pestis: Unique Plasmid Inventory of Strain Java 9 Mediates High Levels of Arsenic Resistance
Source: PLoS One. 2012 Mar 30;7(3):e32911. doi: 10.1371/journal.pone.0032911 (PMC3316555; doi:10.1371/journal.pone.0032911)
Supplement: Table S3 — Primers used in this study. (XLS) [file pone.0032911.s005.xls]

## Sheet: Sheet1
Target	Coordinates	Gene	Amplicon [bp]	Forward Primer (5’-3’)	Reverse Primer (5’-3’)
Tn2503	48-231	arsH	181	TTATACCGATTGAAGTGCGATG	GTTCAAAATCACTCTGCTGCTG
Tn2503	1946-2126	arsB	181	TGGATAGTCCTTGTGTTGTTGC	CGAGGGAGAAGATAACGATTTG
Tn2503	3187-3362	tnpR	176	ACCAGAGTGTGTACGCTCAAGA	ATGCCATGGATATCAGGAAAAC
Tn2503	3895-4098	tnpA	204	CTGGGCTTTGCTGTTTTACTCT	GAAGGGGGATAATTCCAGGTAG
pJARS36	75-227	Addiction antidote (ORF00549)	153	TGCAGCAATTGAAGAAGATGA	TGGAATGATGGATTCCCTTC
pJARS36	104-254	Addiction killer (ORF00550)	151	ACGGAAATTTTGGAGACGTG	TCTGCTTGCTGTGTGCTTTT
pJARS36	662-885	transreplication factor trfA (ORF00513)	224	CTGGATGGACGGGTATGAGT	TTTACATTCCCACCCCGTTA
pJARS36	95-265	conjugal transfer repressor finO	171	CCCCACAGCAGGAAAAGTTA	AGGCAAGCAGATCATCCAGT
pJARS35	227-430	replication initiation factor pir (ORF00512)	204	TGCGTTAAAAGATGGTGCAA	CTTTTCGCTGTGTTGGTGAA
pJARS35	92-287	nickase/DNA-distortion protein (ORF00473)	196	CTAATGCCAGCAAATCAGCA	GTTCCTTTCCCGTCGTAACA
pJARS35	285-510	parA (ORF00506)	226	AGAGATAAACCGCCTCAGCA	AATGCGCGTCATTAGTACCC
pCD-1		lcrV	493	AGGGTGGAACAACTTACTG	GTGCCACTACTAGACAGATGC
pMT		caf1	365	CAGTTCCGTTATCGC	CCGTTTACCTTAGGAGAG
pPCP		pla	437	CAGCCAGTTAGACTGGAAG	ATGCGATACTGGCCTGC
chromosome		psa	296	GATCGCTGCTTGTGG	CCTACCCATGACATC
